# Supplementary material
Source: Springer Nature journal article supplement (https://www.springermedizin.de/resource/supplementary/12933_2014_840_MOESM6_ESM.pdf/9539362)

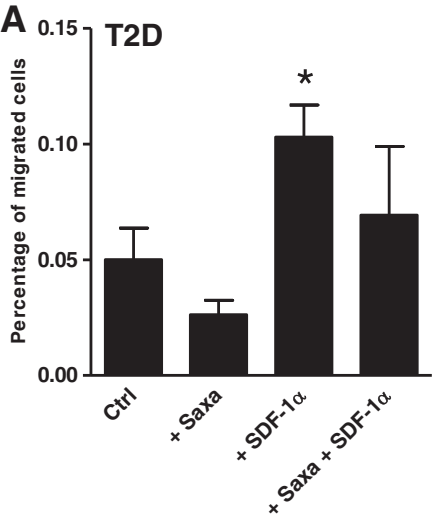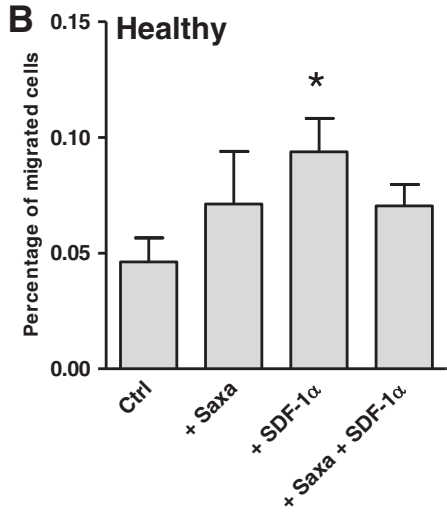

Supplement: MOESM6 [file 9539362]
